# Supplementary material for: Cis-regulatory basis of sister cell type divergence in the vertebrate retina
Source: PubMed Central journal article supplement (PMC6802965; doi:10.7554/elife.48216), 2019-10-21
Supplement: elife-48216-fig2-data1.pdf [file elife-48216-fig2-data1.pdf]

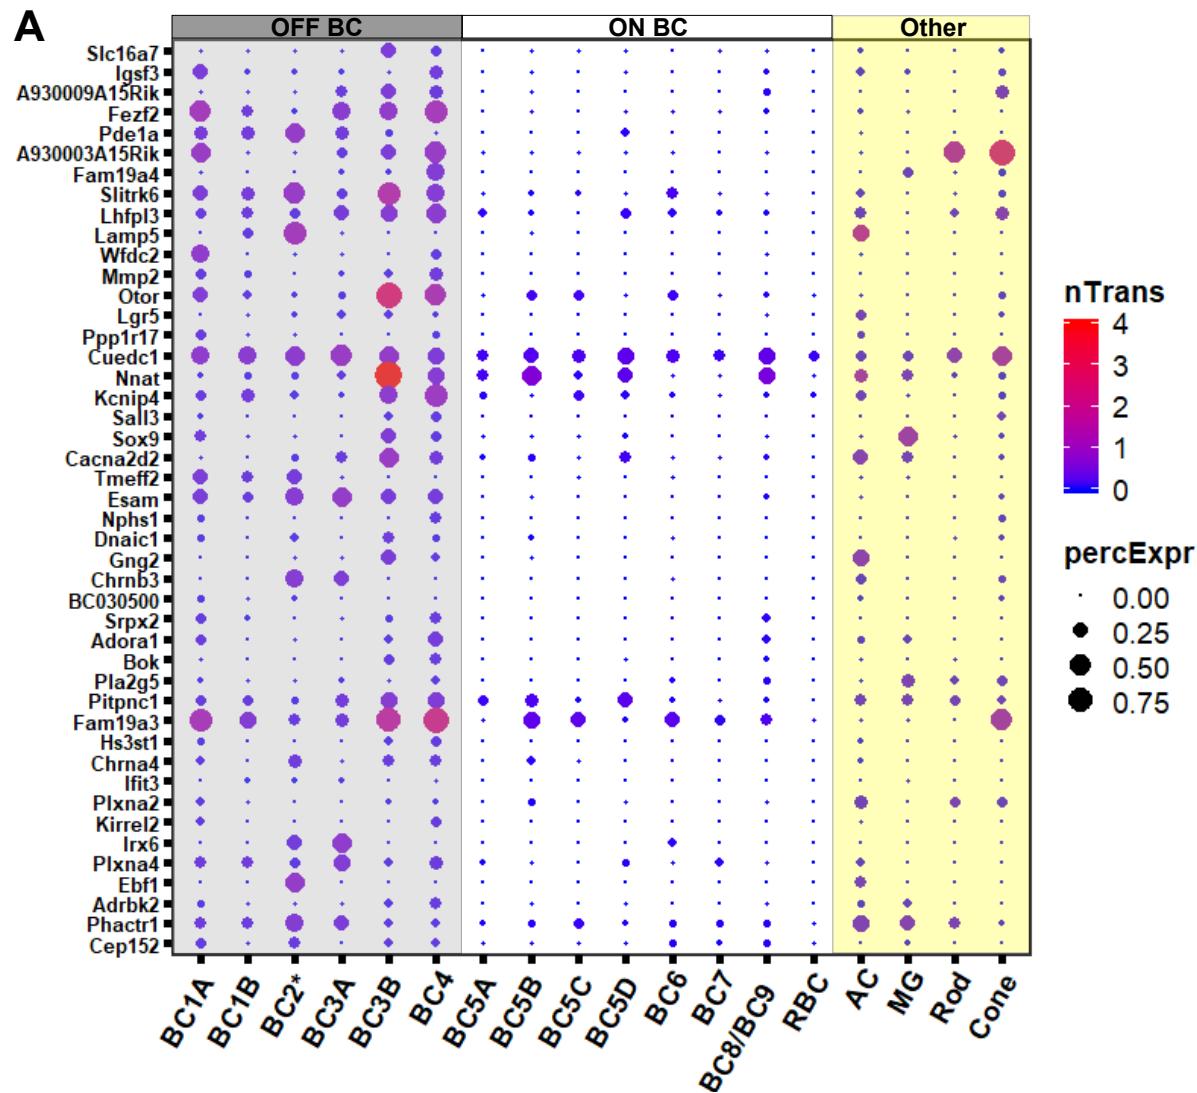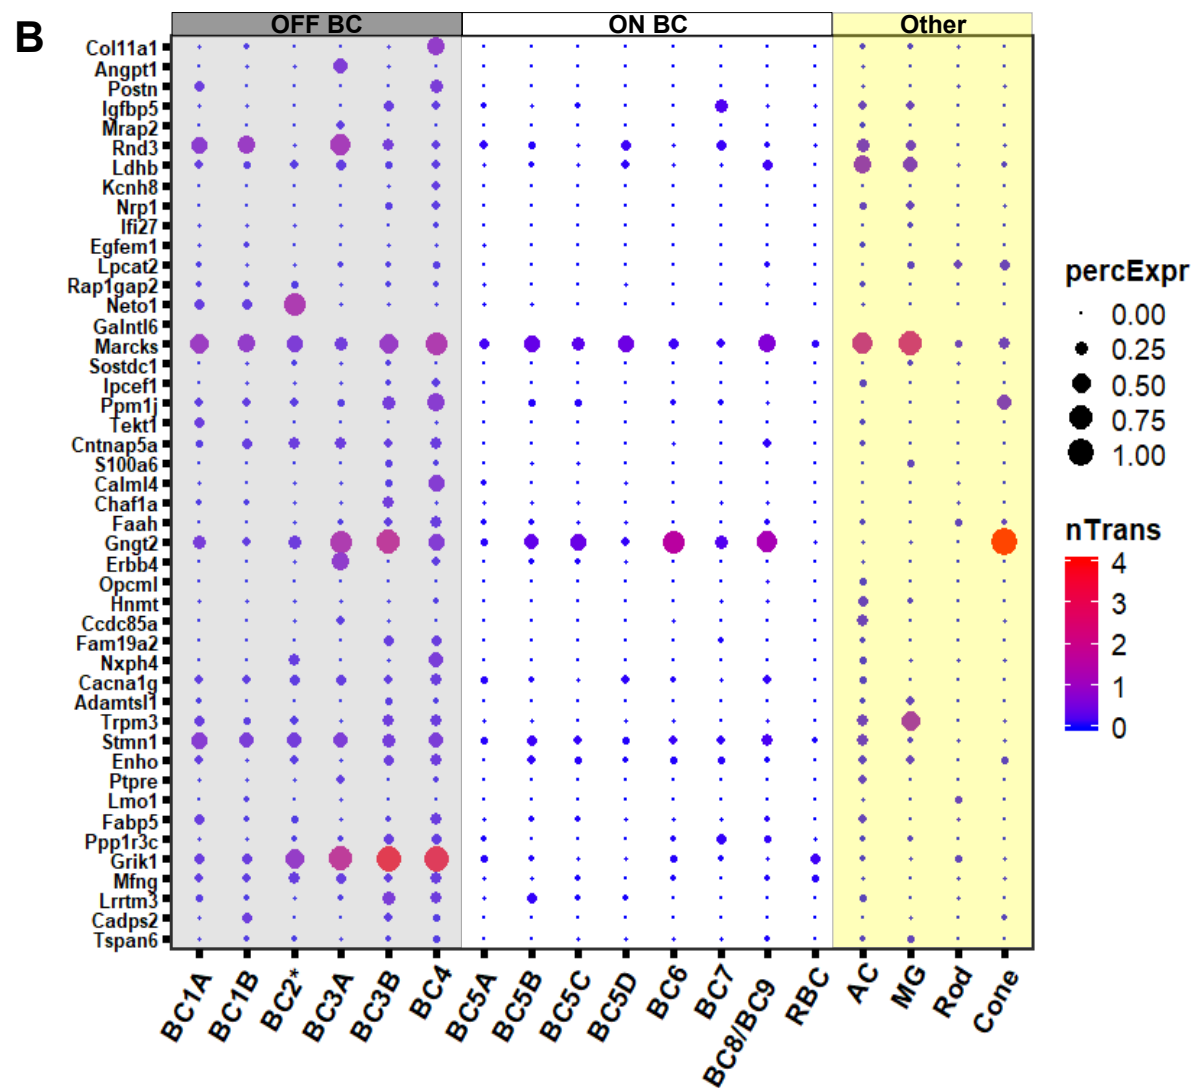

Cell type identified by Shekhar *et al* 2016

**C**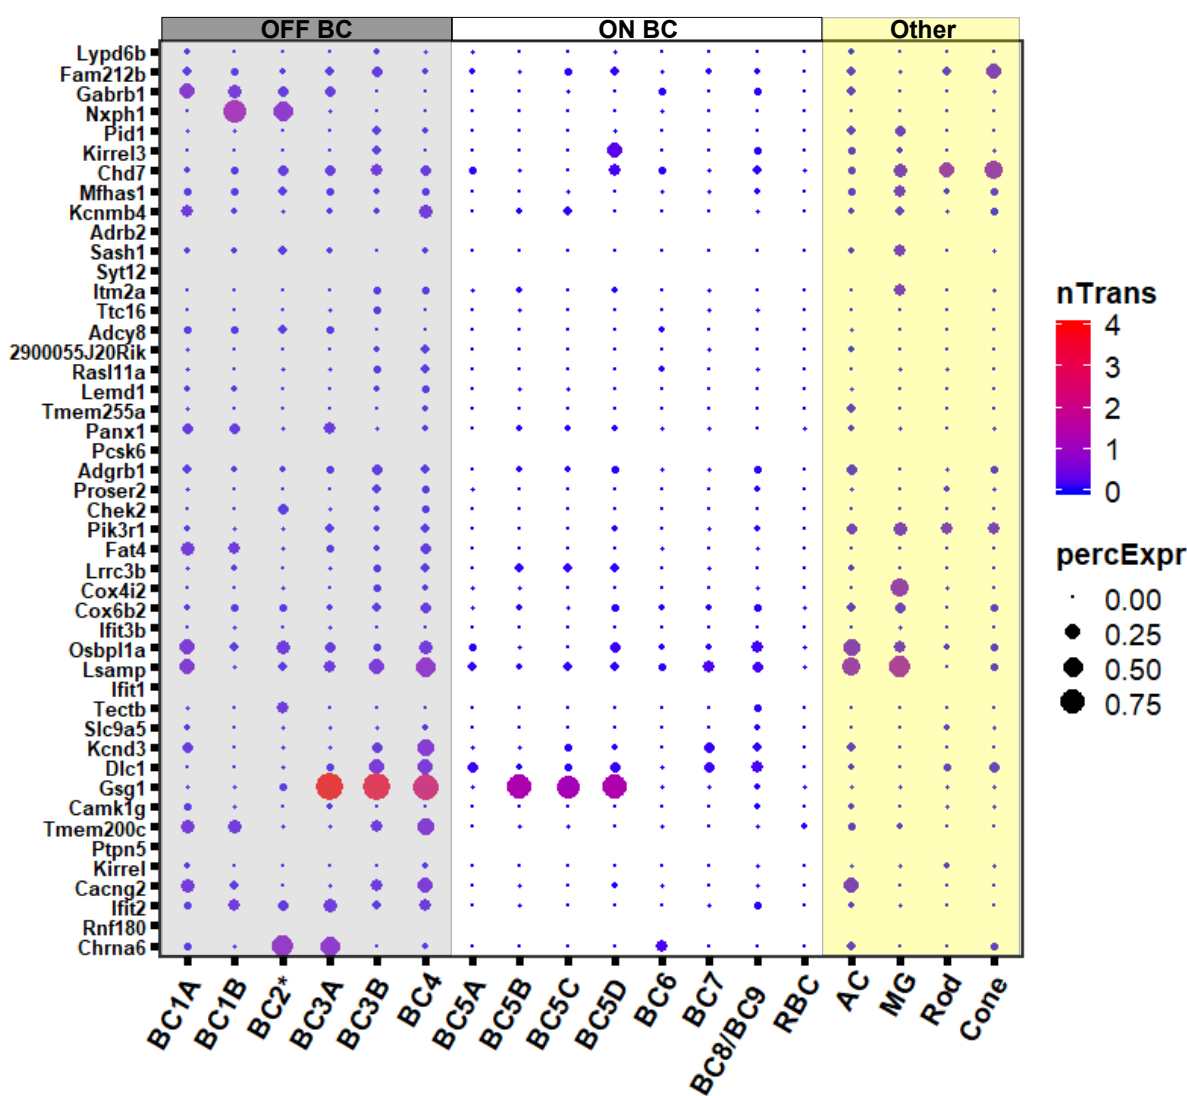**D**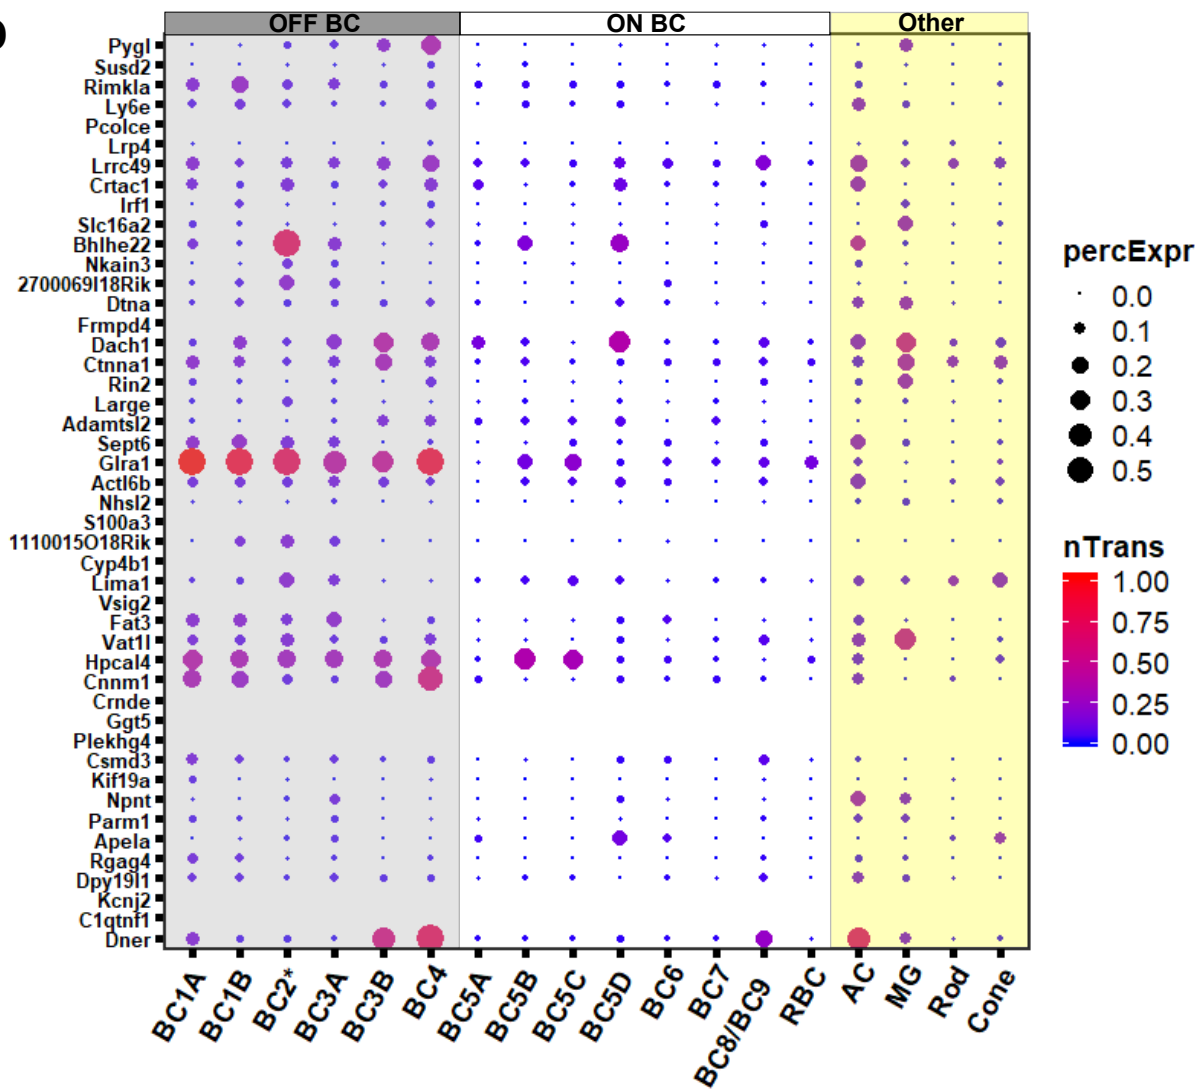Cell type identified by Shekhar *et al* 2016

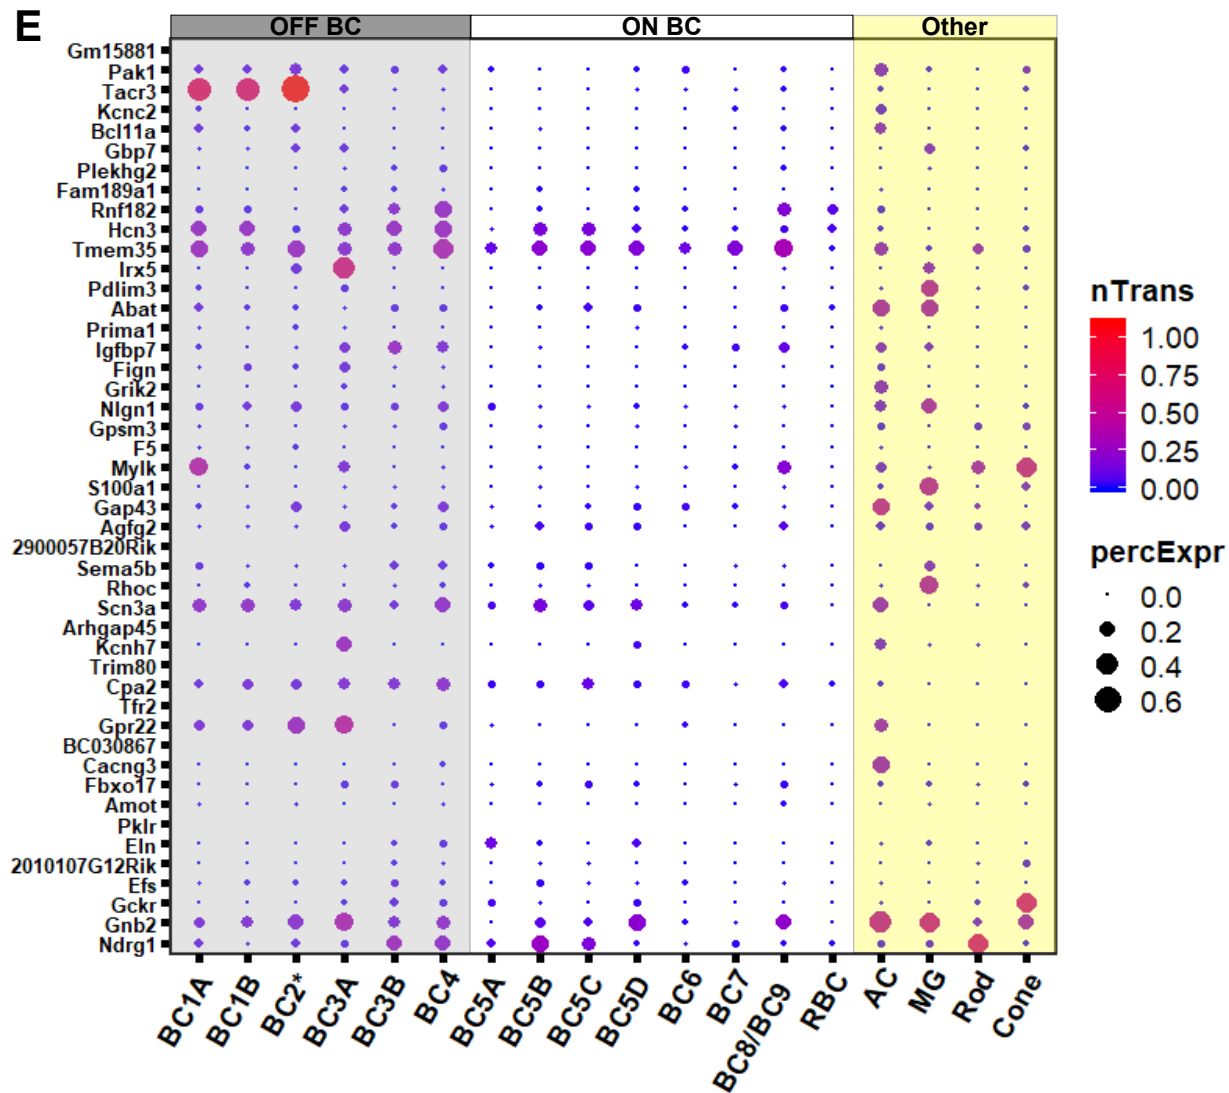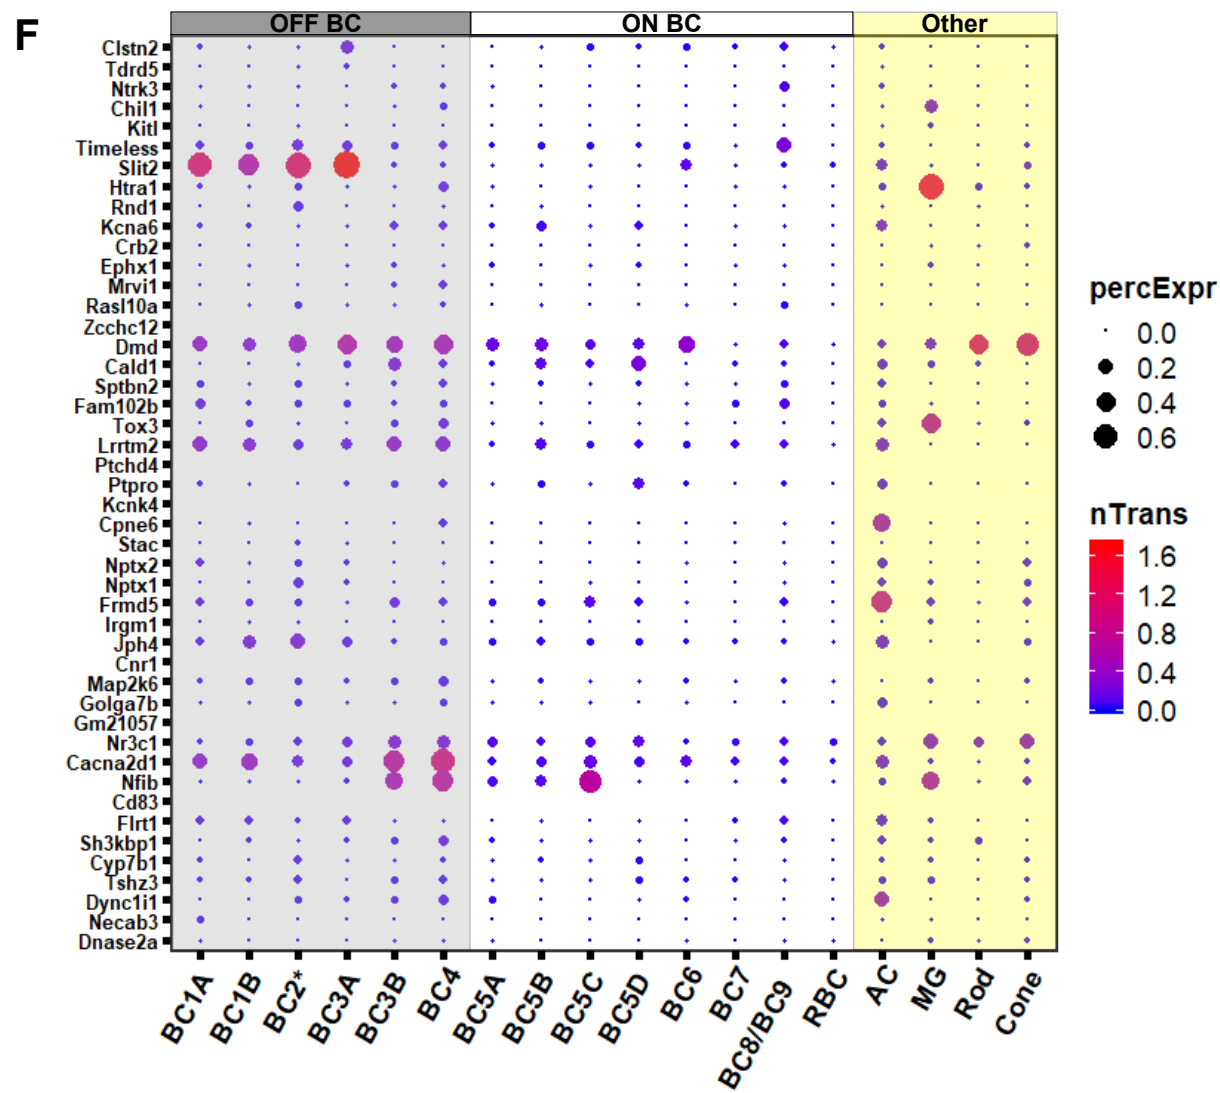

Cell type identified by Shekhar et al/ 2016

**G**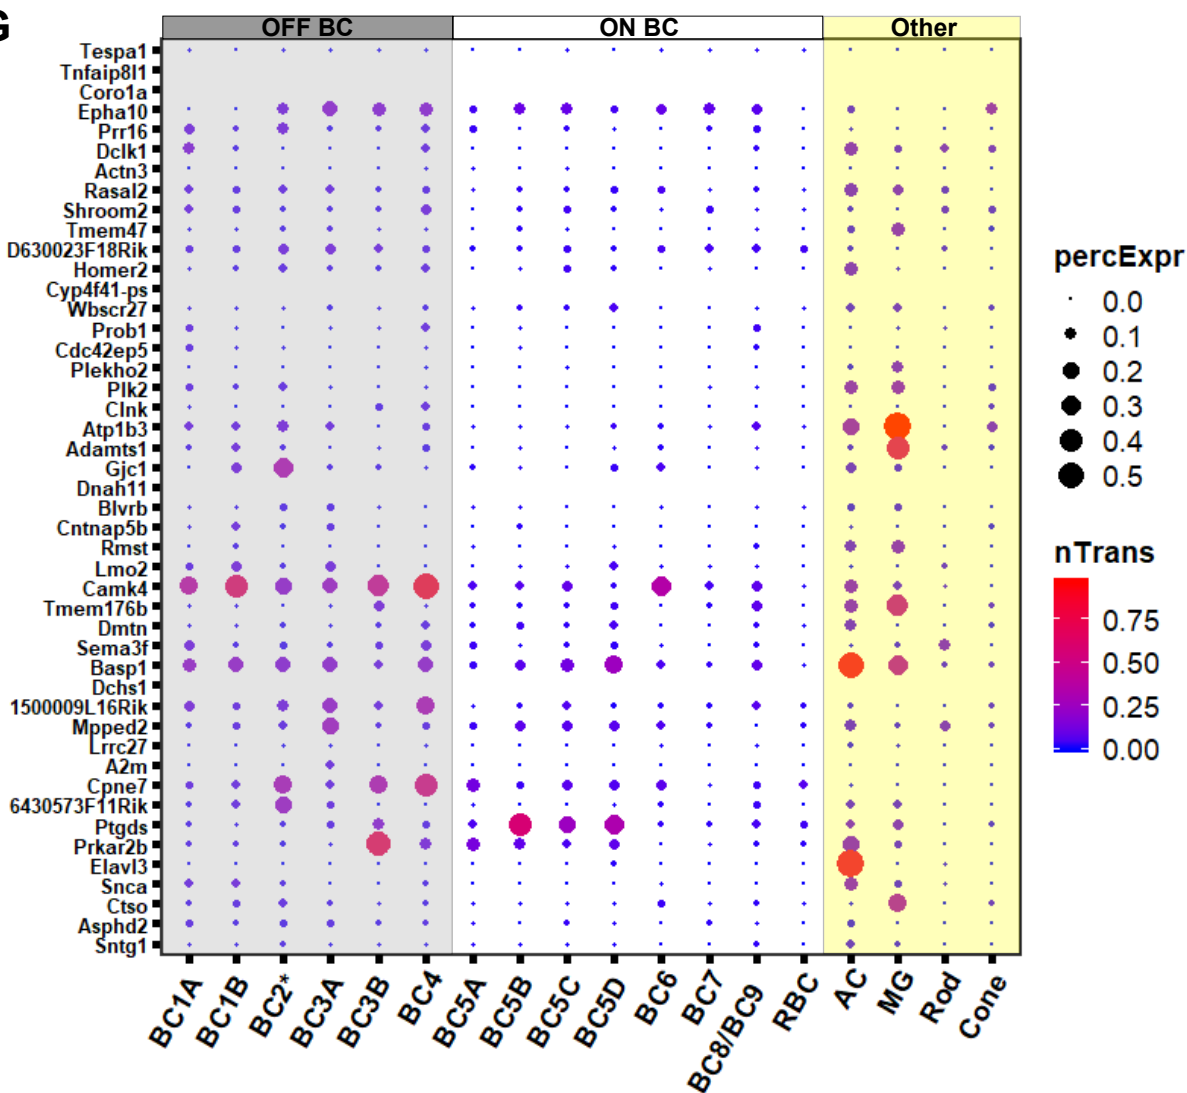**H**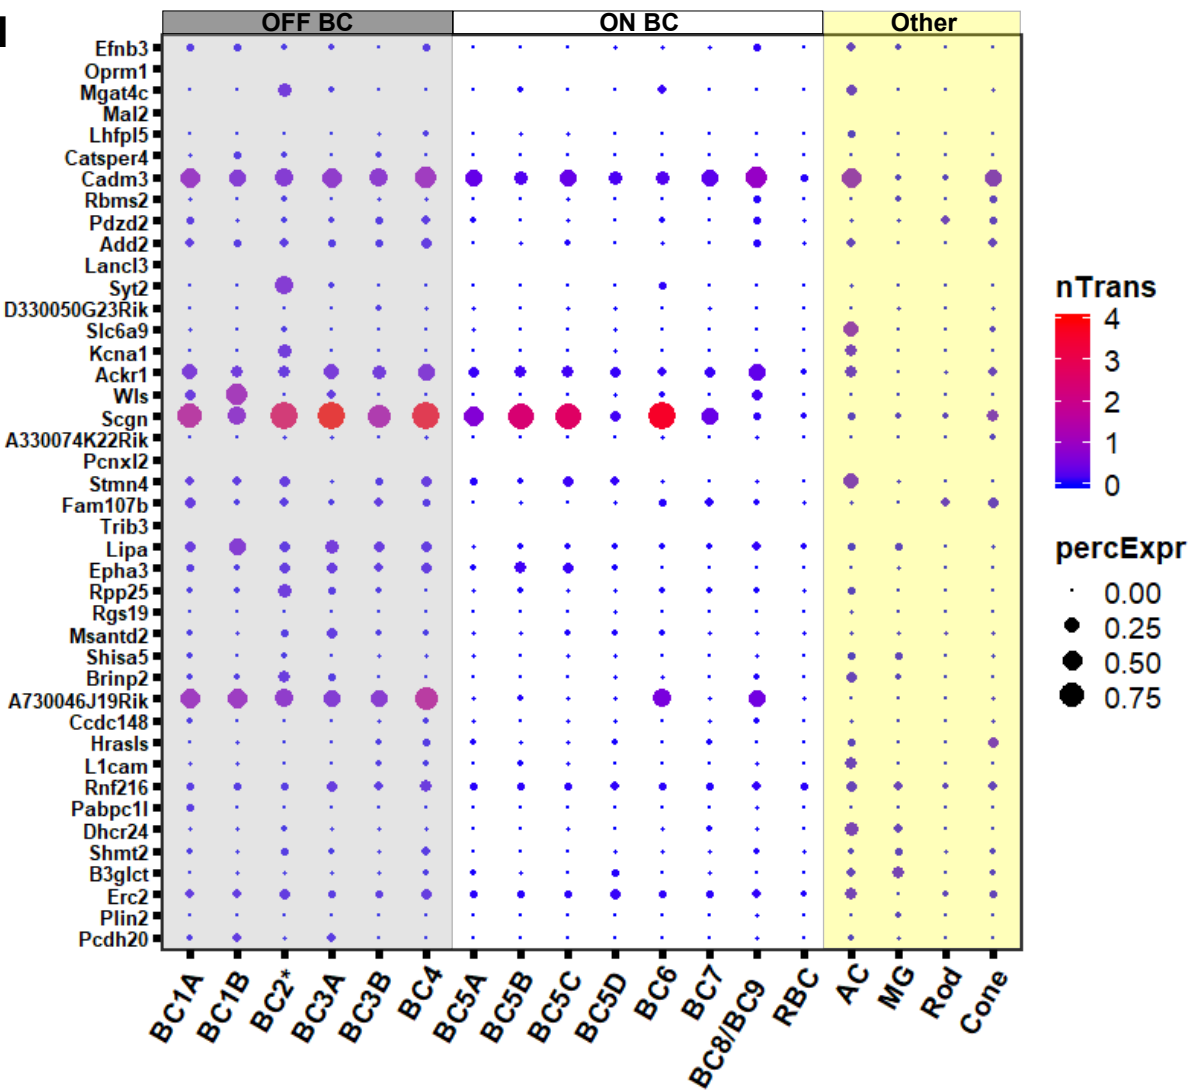Cell type identified by Shekhar *et al* 2016

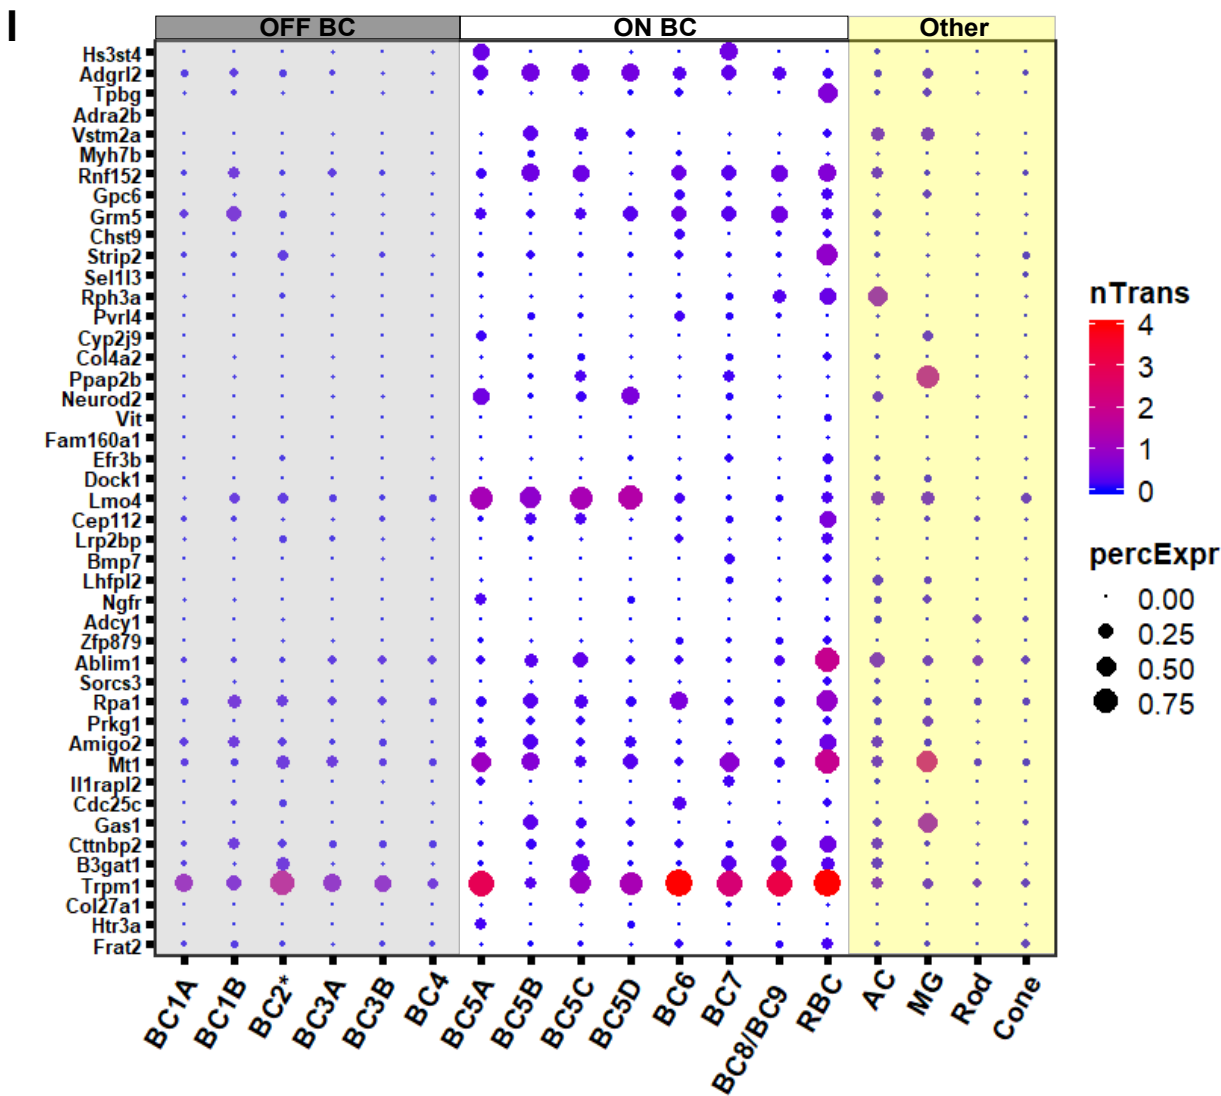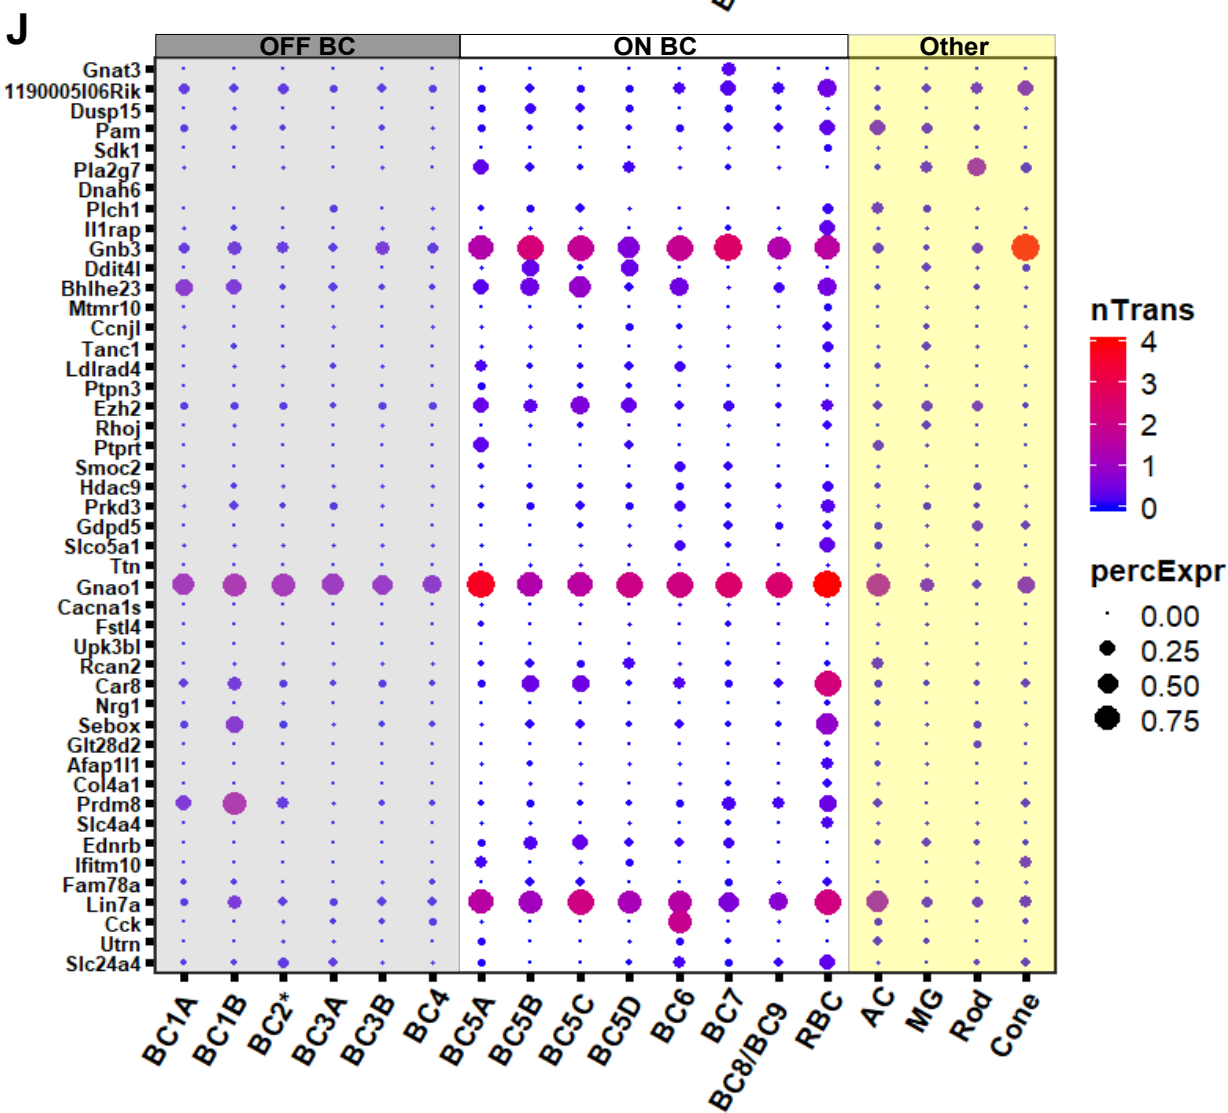

Cell type identified by Shekhar *et al* 2016

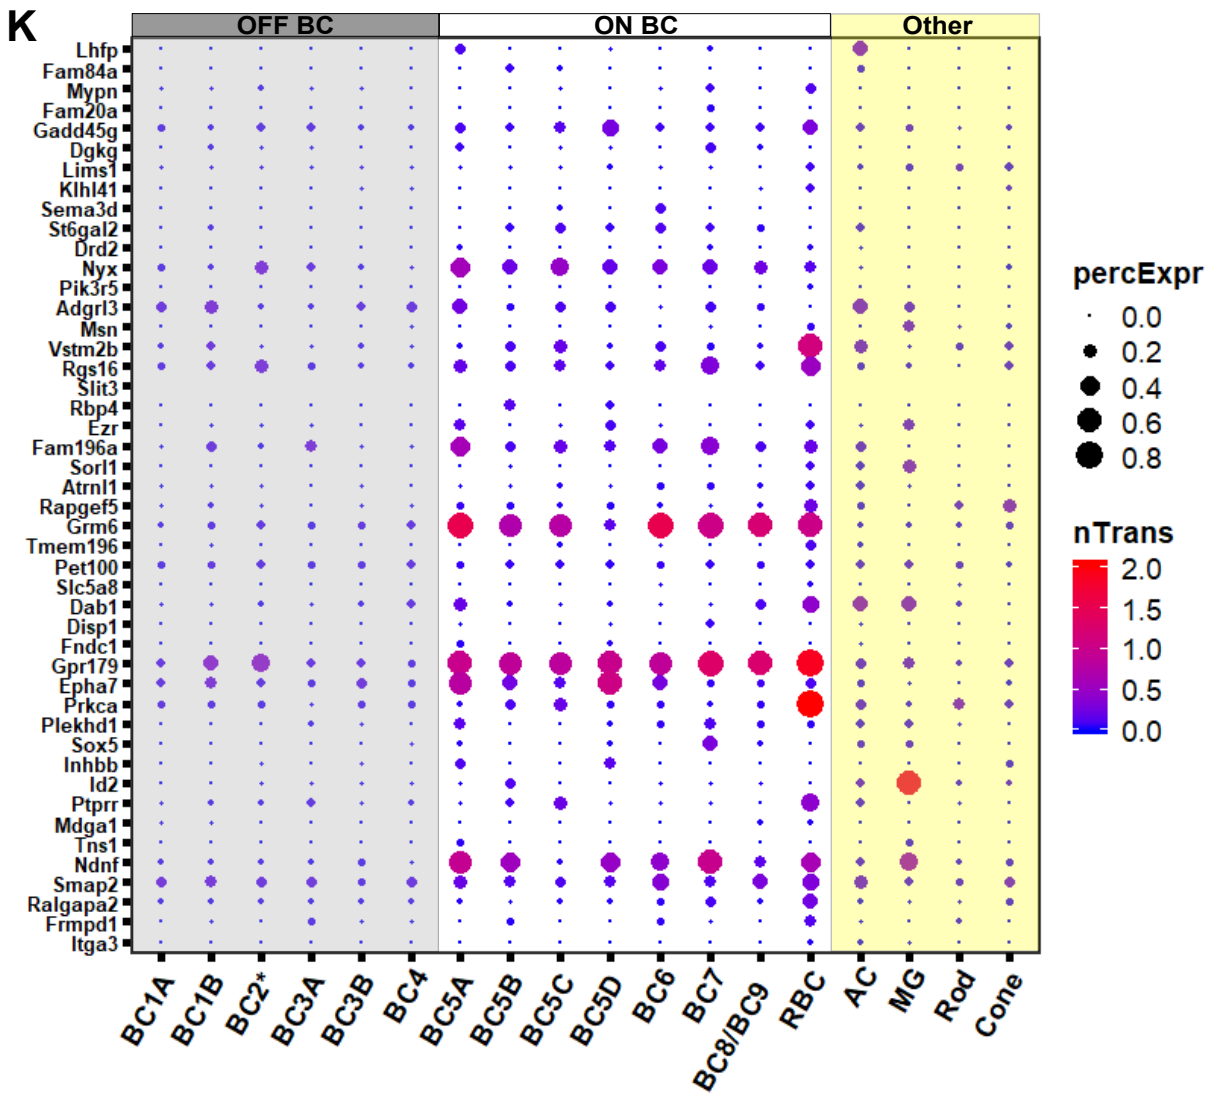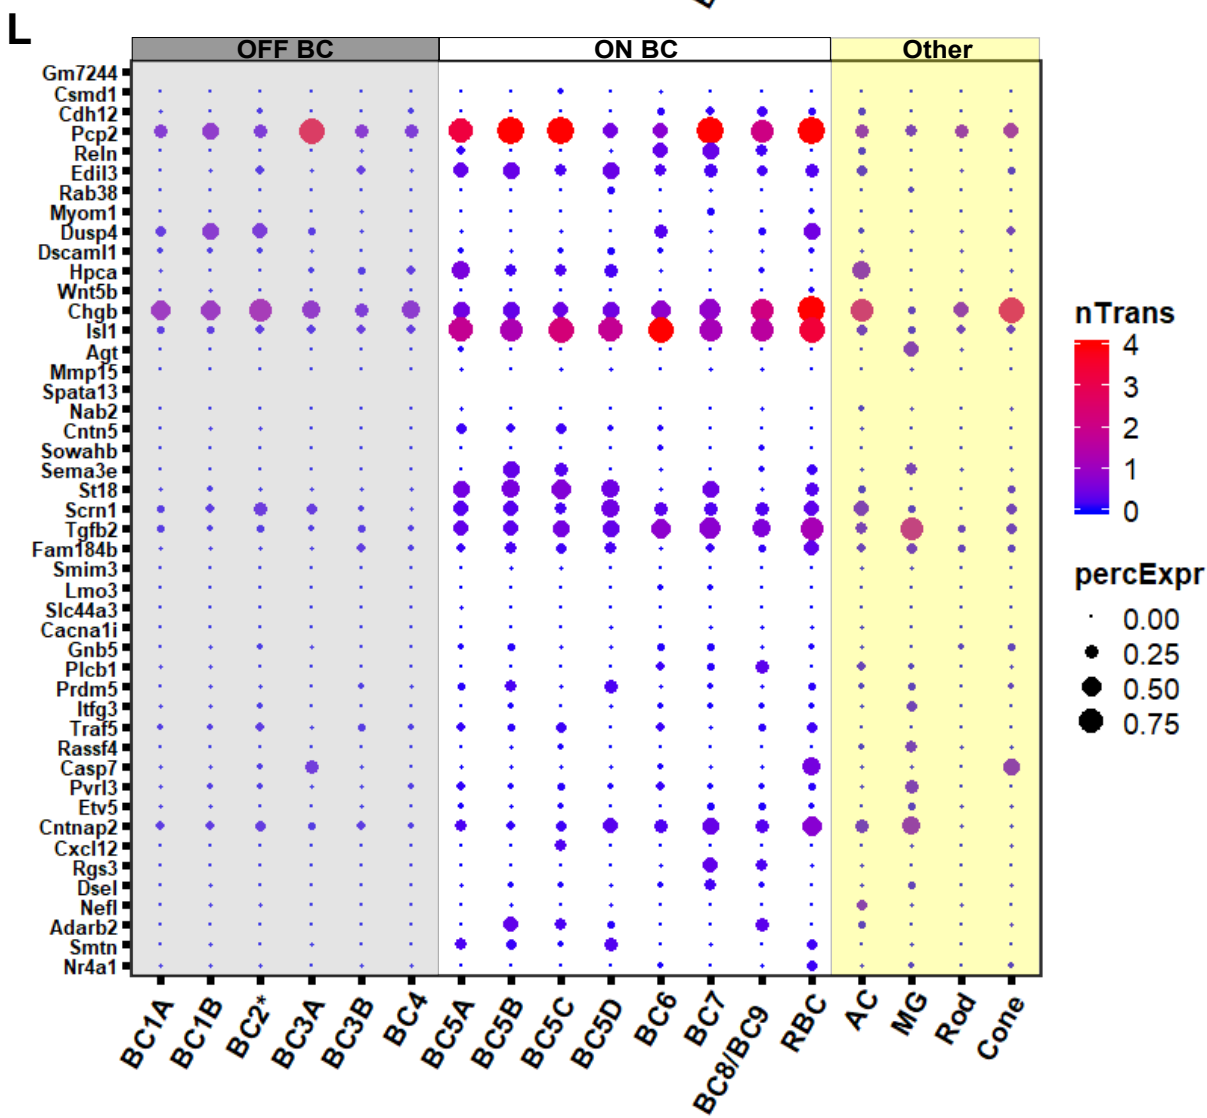

Cell type identified by Shekhar *et al* 2016

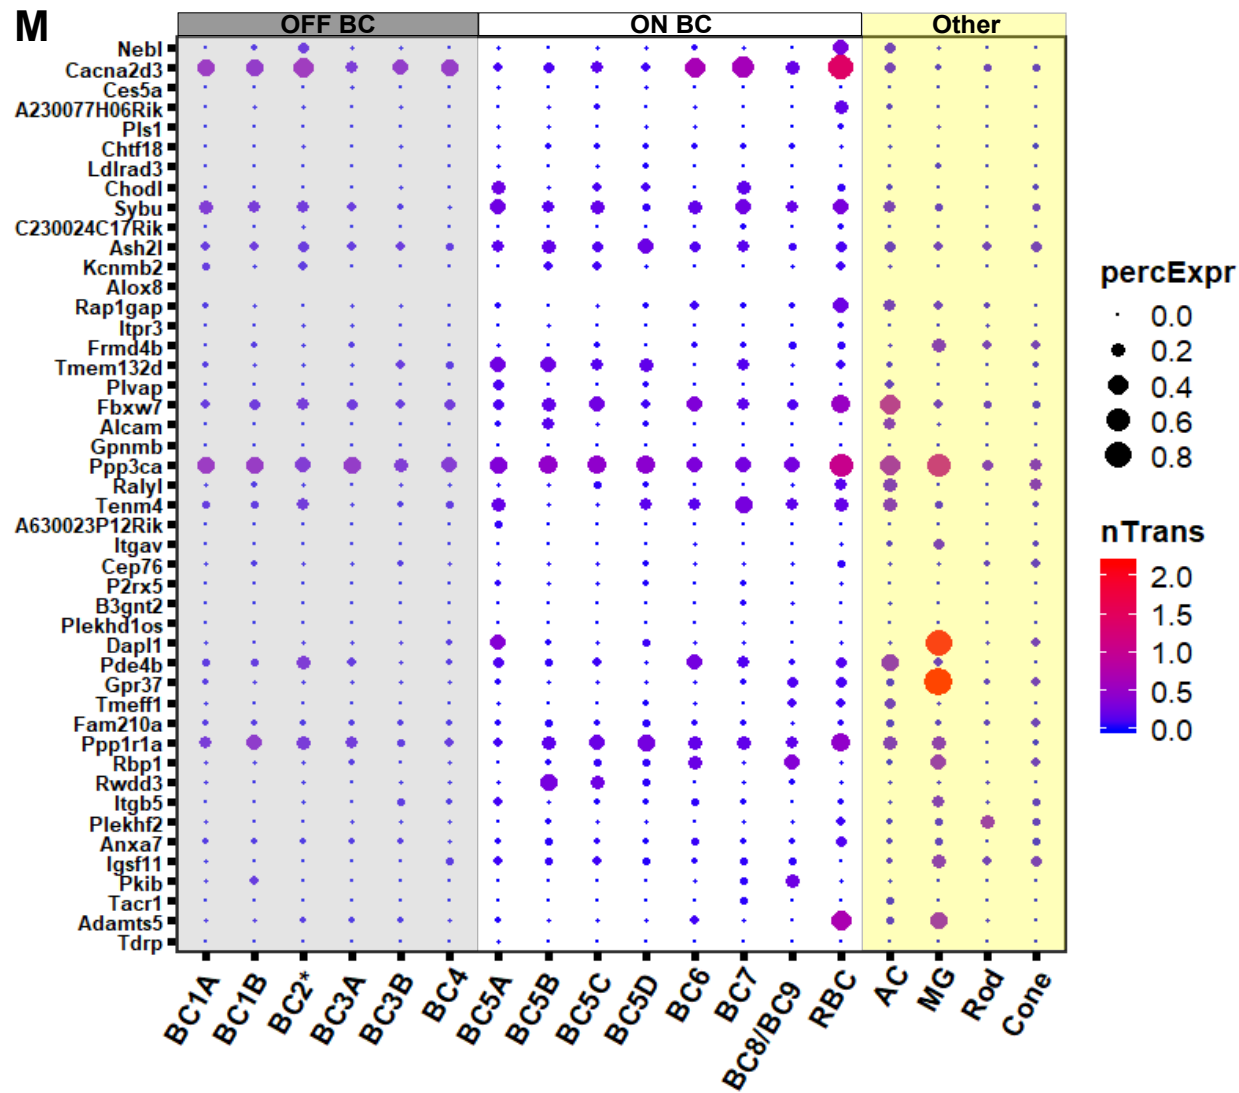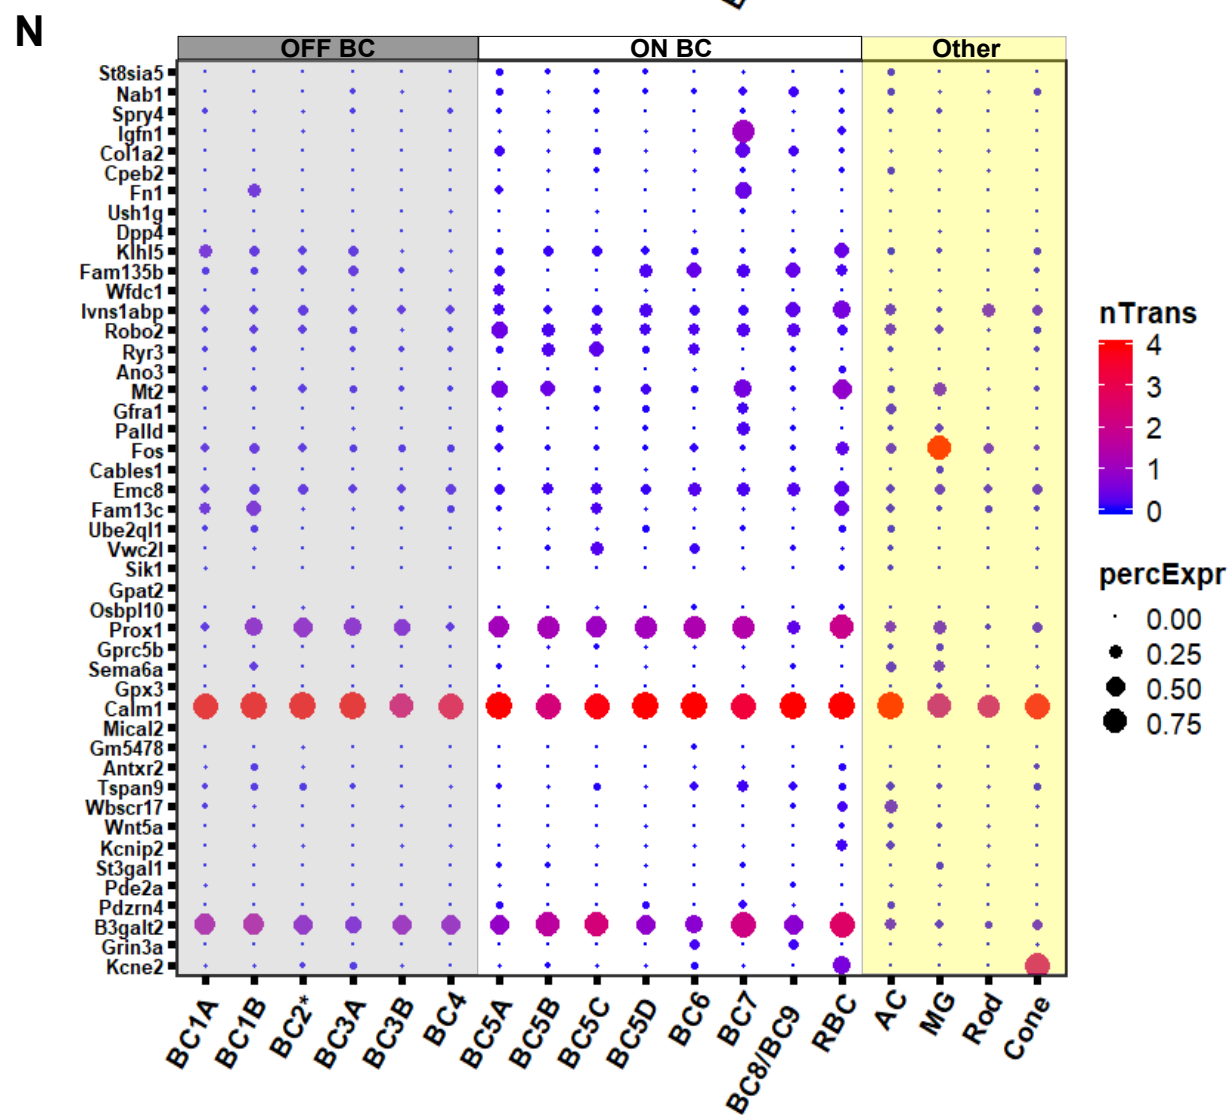

Cell type identified by Shekhar *et al* 2016

O

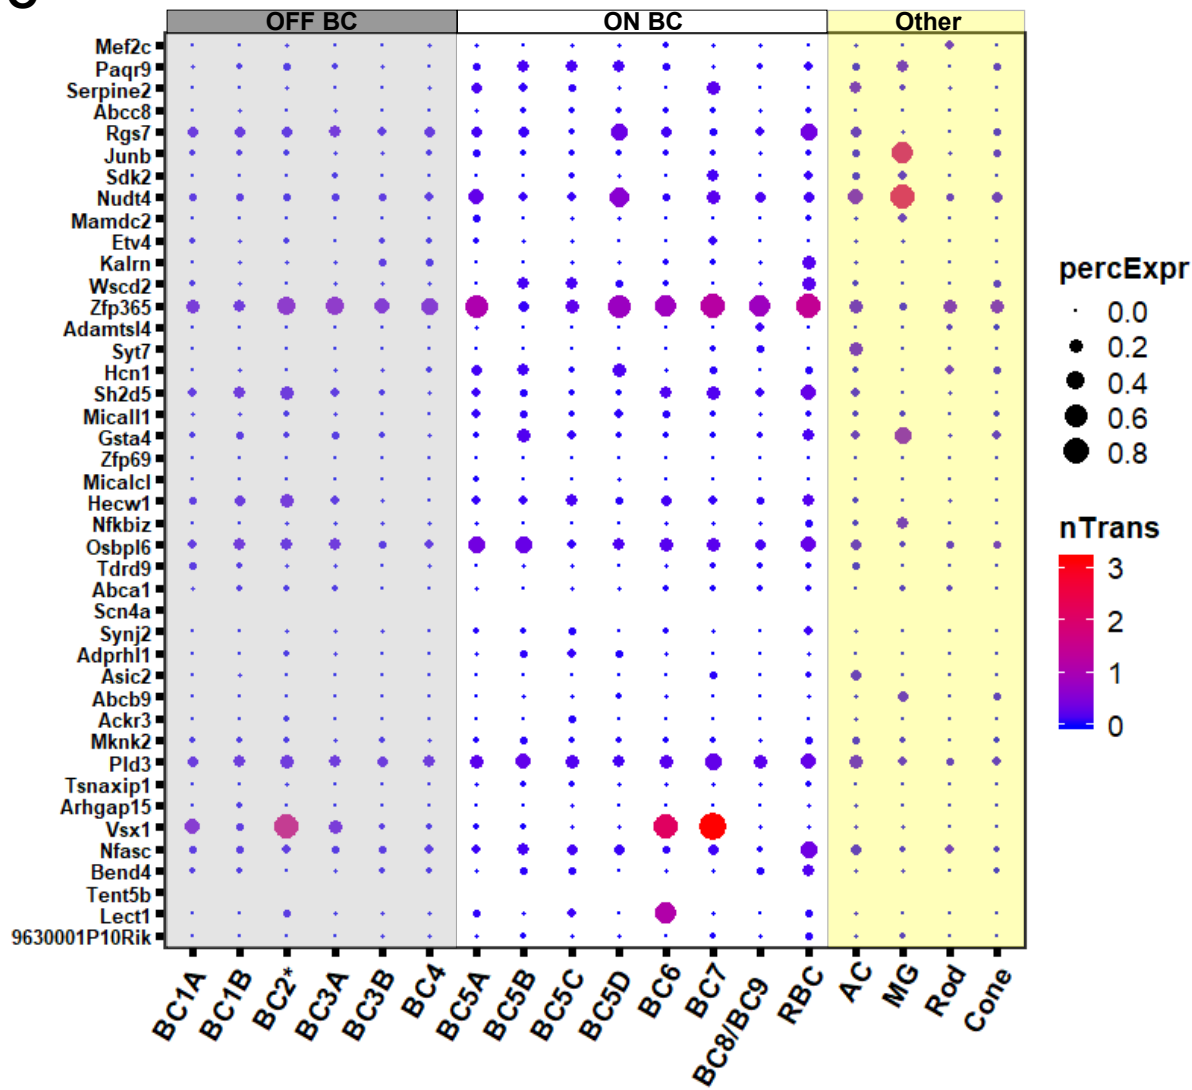

Cell type identified by Shekhar et al 2016
