# Supplementary material for: Cis-regulatory basis of sister cell type divergence in the vertebrate retina
Source: PubMed Central journal article supplement (PMC6802965; doi:10.7554/elife.48216), 2019-10-21

**A**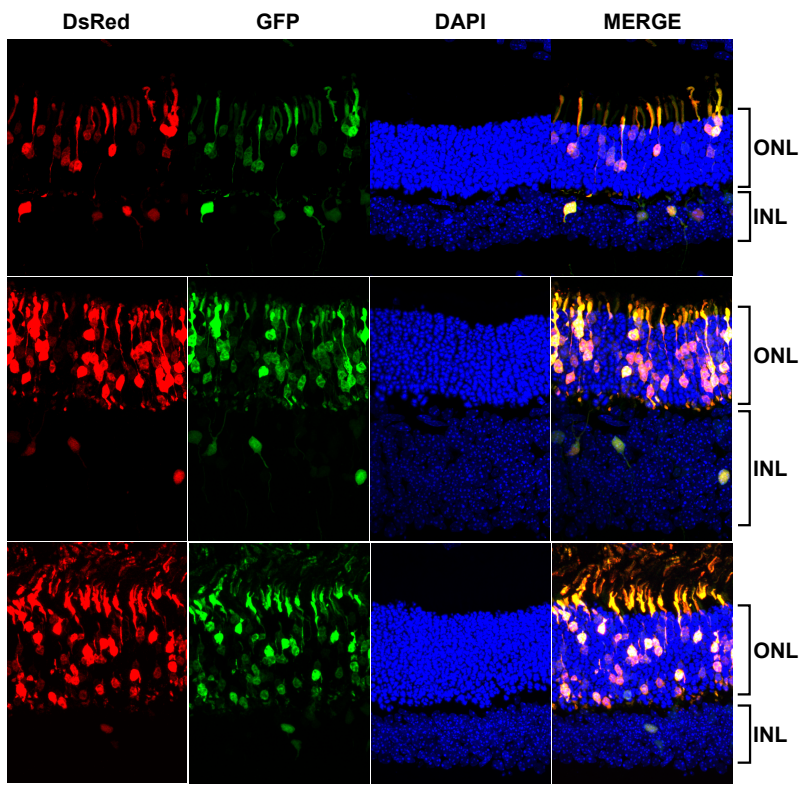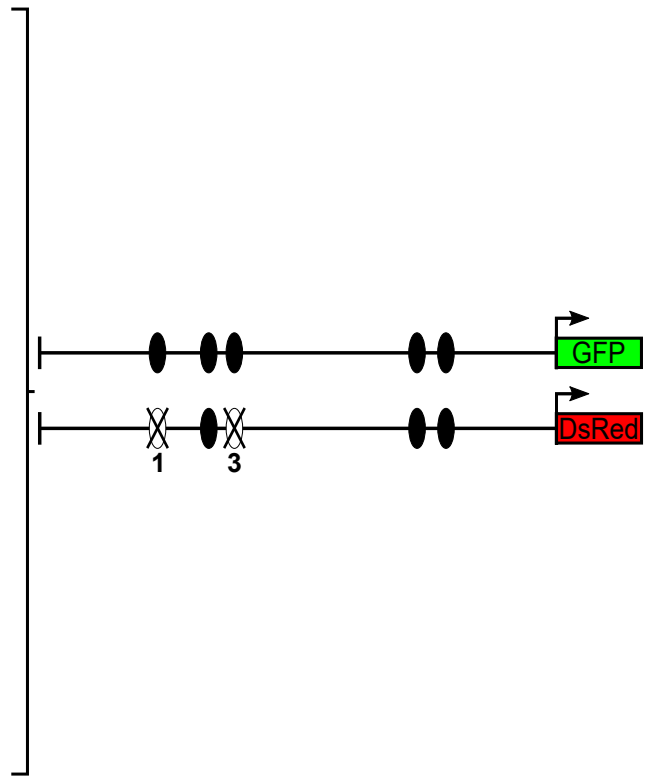**B**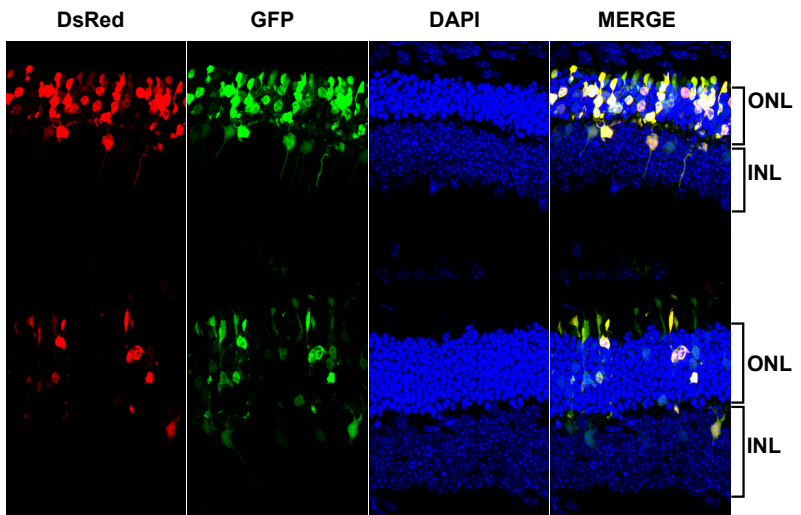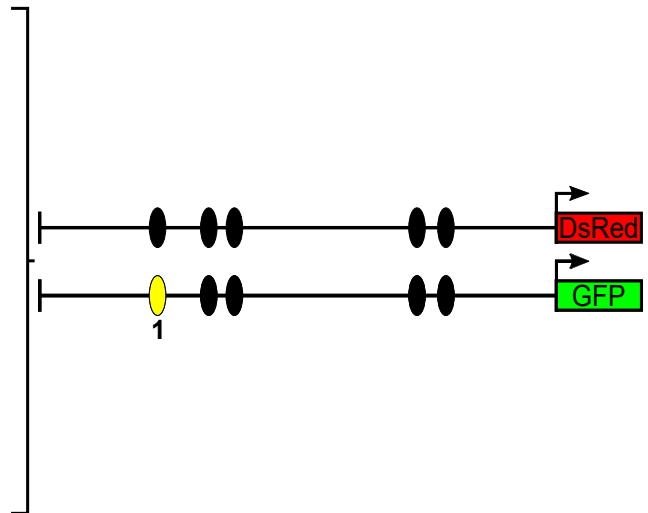**C**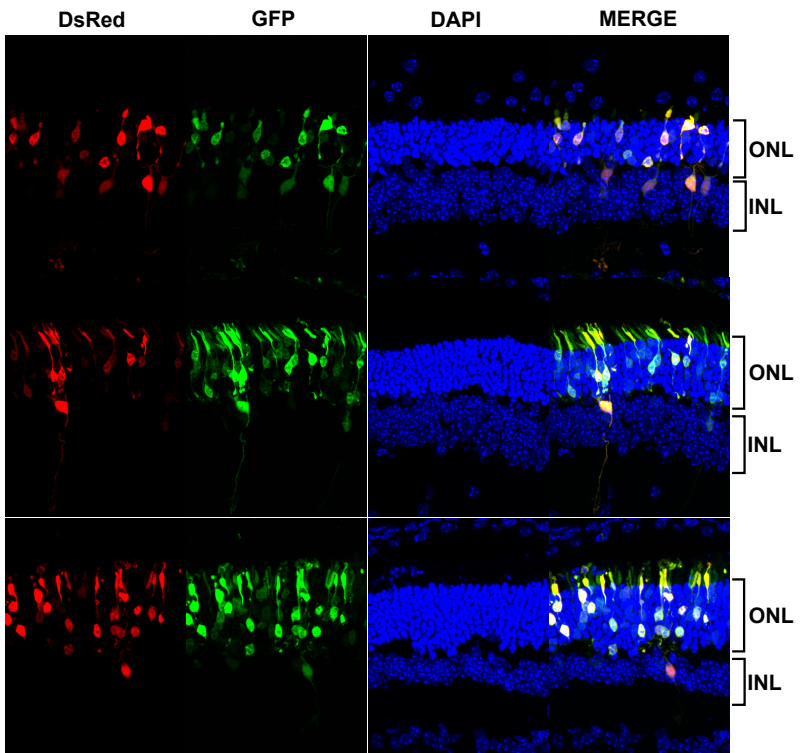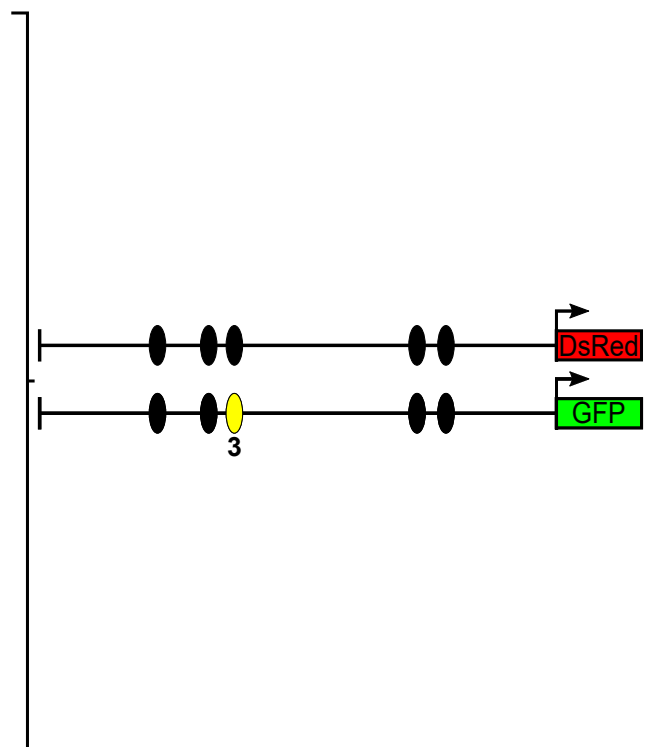

**D**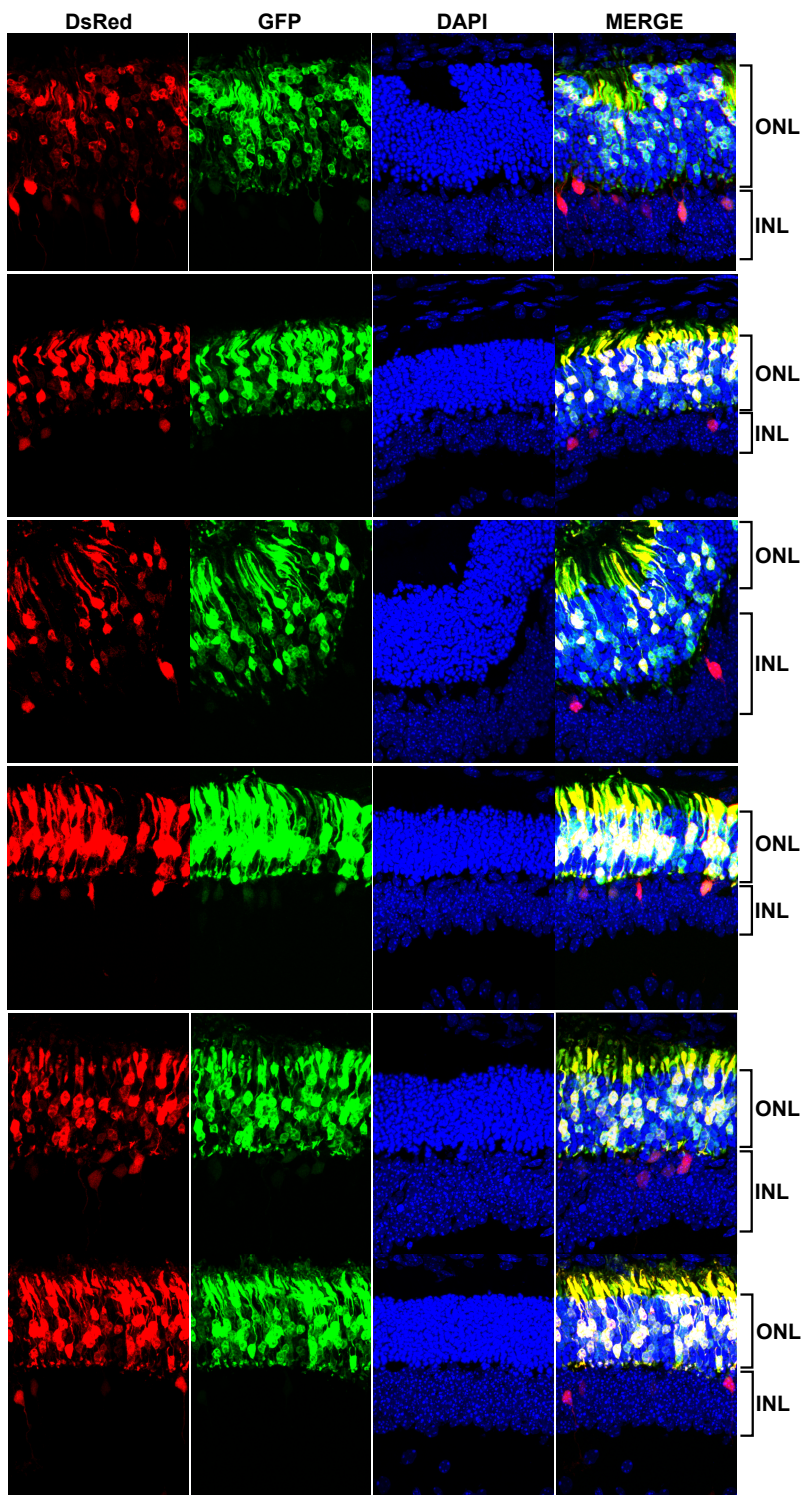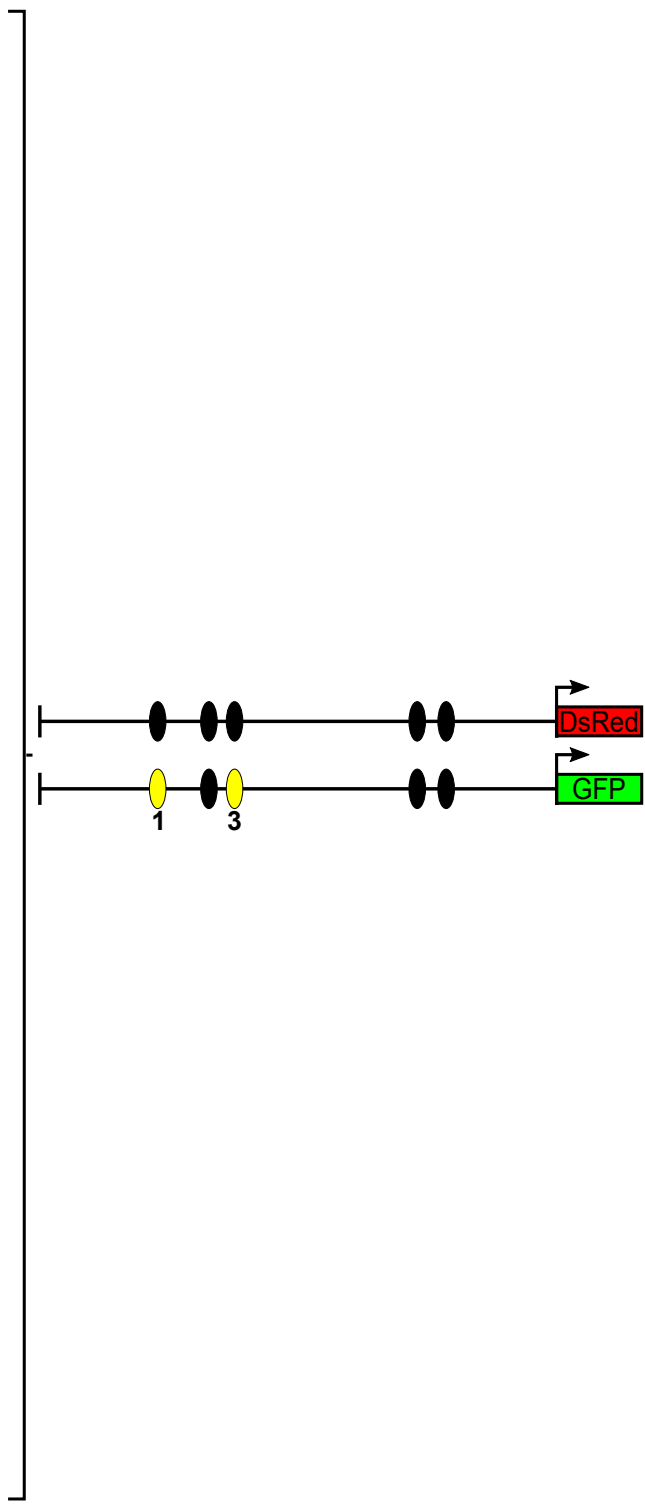**E**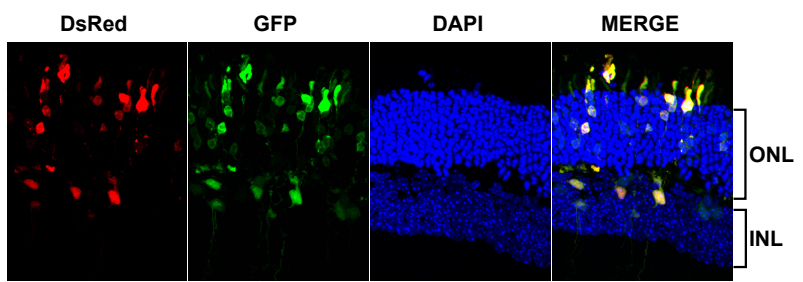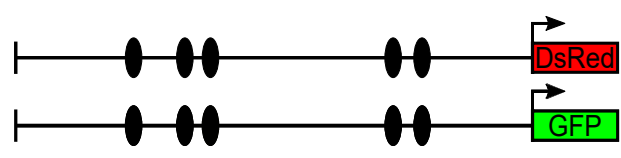

Supplement: elife-48216-fig6-data1.pdf [file elife-48216-fig6-data1.pdf]
